# Supplementary material for: Static and Dynamical Quantum Studies of CX3-AlX2 and CSiX3-BX2 (X = F, Cl, Br) Complexes with Hydrocyanic Acid: Unusual Behavior of Strong π-Hole at Triel Center
Source: MDPI journal article supplement (doi:10.3390/ijms24097881), 2023-04-26
Supplement: s1 [file s1]

## Supplementary Information

# Static and Dynamical Quantum Studies of $CX_3-AlX_2$ and $CSiX_3-BX_2$ ( $X = F, Cl, Br$ ) Complexes with Hydrocyanic Acid: Unusual Behavior of Strong $\pi$ -Hole at Triel Center

Mariusz Michalczyk <sup>1,\*</sup>, Kamil Wojtkowiak <sup>2</sup>, Jarosław J. Panek <sup>2</sup>, Aneta Jezierska <sup>2</sup> and Wiktor Zierkiewicz <sup>1,\*</sup>

<sup>1</sup> Faculty of Chemistry, Wrocław University of Science and Technology, Wybrzeże Wyspiańskiego 27, 50-370 Wrocław, Poland

<sup>2</sup> Faculty of Chemistry, University of Wrocław, ul. F. Joliot-Curie 14, 50-383 Wrocław, Poland;  
kamil.wojtkowiak@chem.uni.wroc.pl (K.W.); jaroslaw.panek@chem.uni.wroc.pl (J.J.P.);  
aneta.jezierska@chem.uni.wroc.pl (A.J.)

\* Correspondence: mariusz.michalczyk@pwr.edu.pl (M.M.);  
wiktor.zierkiewicz@pwr.edu.pl (W.Z.)

### Table of contents:

1. **Figure S1.** Structures (including refcodes) of a crystalline compound from CSD database with a geometry corresponding to the one discussed in the work.
2. **Table S1.** MEP maxima at the 0.001 au isodensity contour on isolated  $TF_3-TrF_2$  monomers ( $Tr = B, Al, Ga$ ;  $T = C, Si, Ge$ ). Data given in kcal/mol.
3. **Table S2.** MEP maxima at the 0.001 au isodensity contour on isolated  $TCl_3-TrCl_2$  monomers ( $Tr = B, Al, Ga$ ;  $T = C, Si, Ge$ ). Data given in kcal/mol.
4. **Table S3.** MEP maxima at the 0.001 au isodensity contour on isolated  $TBr_3-TrBr_2$  monomers ( $Tr = B, Al, Ga$ ;  $T = C, Si, Ge$ ). Data given in kcal/mol.
5. **Table S4.** Summary of trimers geometry optimization.
6. **Table S5.** The  $\sigma$ -hole maxima at the 0.001 au isodensity contour on  $TX_3-TrX_2$  dimers ( $Tr = B, Al$ ;  $T = C, Si$ ;  $X = F, Cl, Br$ ) with hydrogen cyanide. Data given in kcal/mol.
7. **Figure S2.** Time-evolution of metric parameters between the interacting pairs. Calculations performed at the PBE-D3BJ/TZVP-MOLOPT-GTH level of theory.
8. **Figure S3.** Time-evolution of metric parameters between the interacting pairs in the  $\pi$ -hole/ $\pi$ -hole trimers. Left: first interacting pair, Right: second interacting pair. Calculations performed at the PBE-D3BJ/TZVP-MOLOPT-GTH level of theory.

9. **Figure S4.** Time-evolution of Tr...N-C angles throughout the BOMD simulation for the  $\pi$ -hole/ $\pi$ -hole trimers. Calculations performed at the PBE0-D3BJ/TZVP-MOLOPT-GTH level of the theory.
10. **Figure S5.** QTAIM diagrams for “unusual trimers” studied in this work. QTAIM bond paths are represented by dashed lines while numbers given are  $\rho$  at BCPs in au.
11. **Figure S6.** Optimized structures of trimers obtained by attaching second HCN molecule to the  $\sigma$ -hole site of  $\text{TX}_3\text{-TrX}_2\cdots\text{NCH}$  dimers.
12. **Figure S7.** Overview of structures generated for the interaction energy study of the “residual  $\pi$ -hole”  $\text{CF}_3\text{-AlF}_2 + 2\text{HCN}$  trimer. The optimized atomic positions are shown, but the HCN molecule at 0 degrees label was removed and used as an interaction probe. It was located at the positions indicated by coloured sticks and numbered with angle values from -30 to 120 degrees. The vertically aligned HCN molecule was removed in the first set of structures, but present in the second set.
13. **Table S6.** Coordinates of dimers
14. **Table S7.** “Unusual” trimers coordinates

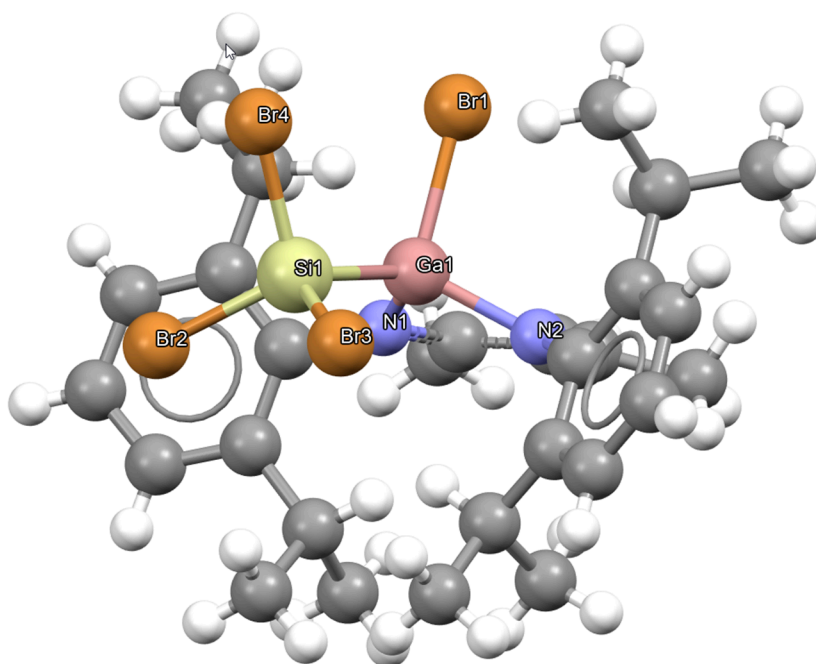

**Database Identifier:** HUHKT

**Formula:**  $[L(Br)Ga]_2Si:CO$  ( $L = HC[C(Me)N(2,6-Pr_2-C_6H_3)]_2$ )

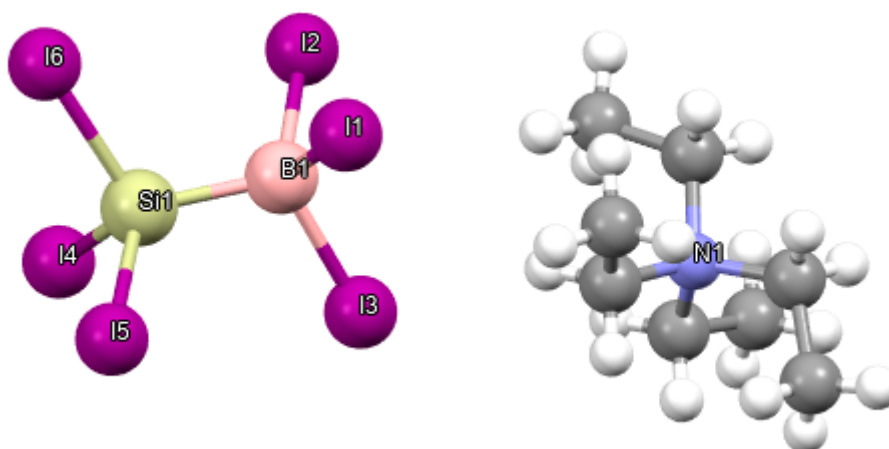

**Database Identifier:** JEKXUV

**Formula:**  $[Et_4N][I_3SiBI_3]$

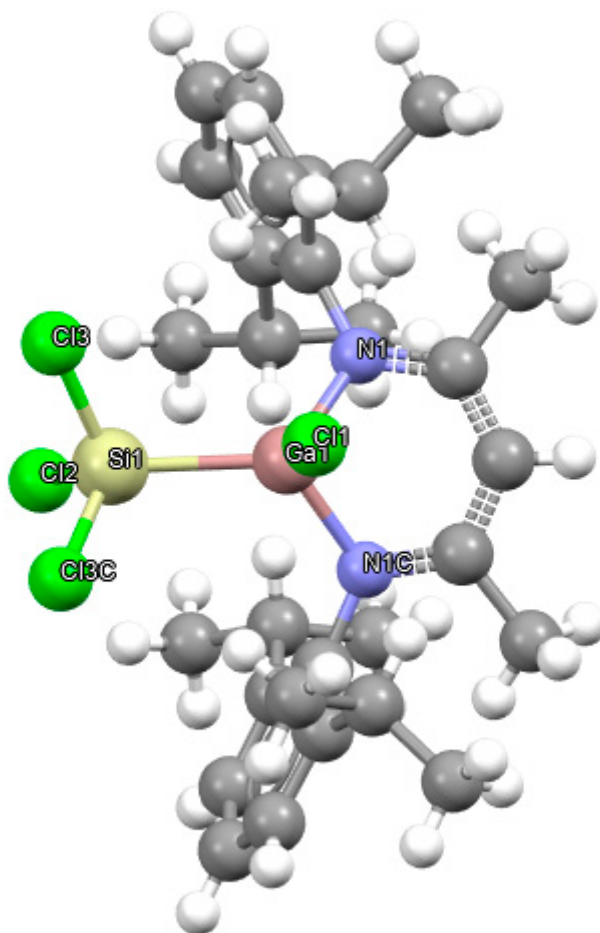

**Database Identifier:** JOHFAO

**Formula:**  $[\text{Cl}_3\text{Si}\{\text{ClGa}(\text{DDP})\}]$ , DDP= 2-[(2,6-diisopropyl-phenyl)amino]-4-[(2,6-diisopropylphenyl)imino]-2-pentene

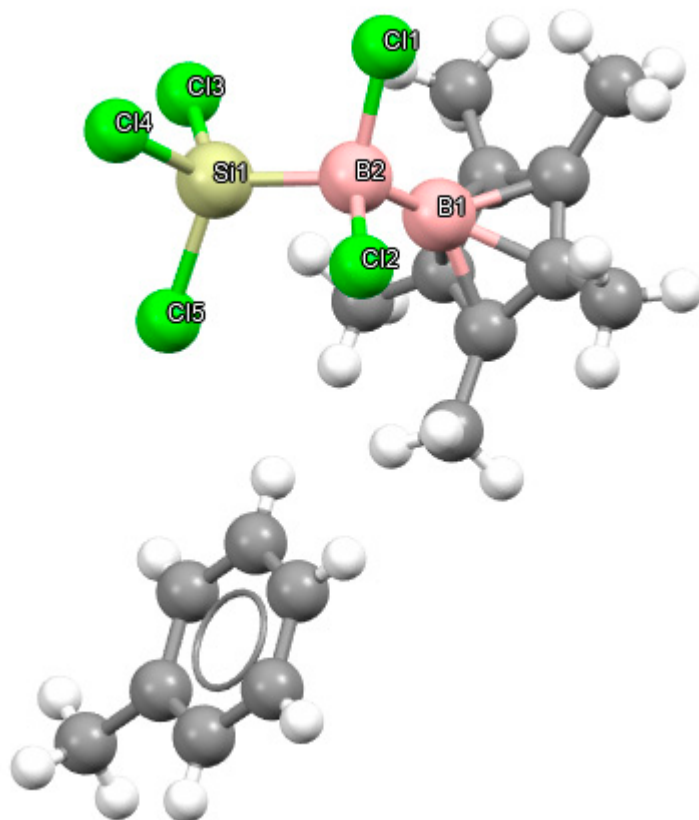

**Database Identifier: WIZZEK**

**Formula:**  $(C_5Me_5)B \rightarrow BC l_2 SiCl_3$

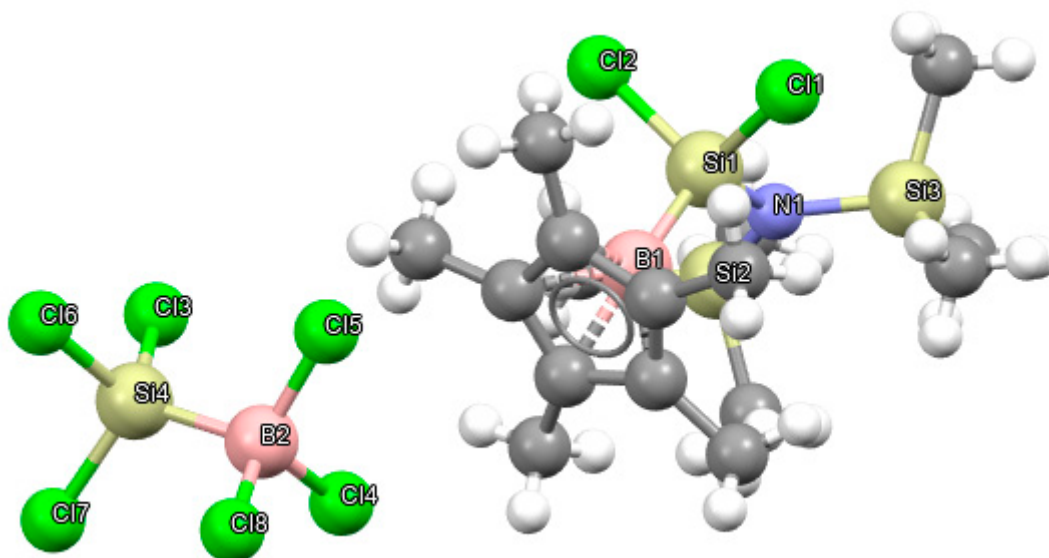

**Database Identifier: AWAWON**

**Formula:**  $[Cp^*BSi(Cl)_2N(TMS)_2][BCl_3SiCl_3]$

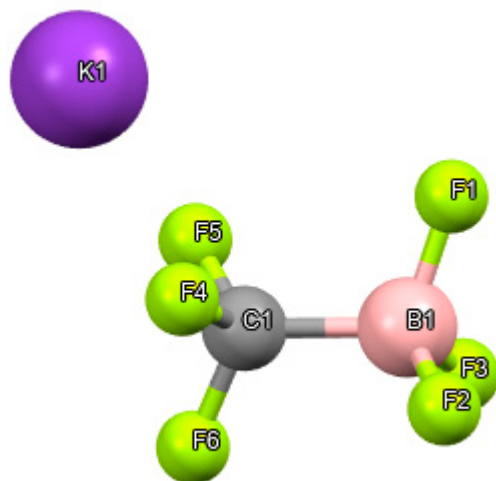

**Database Identifier:** KTFMFB

**Formula:** K[CF<sub>3</sub>BF<sub>3</sub>]

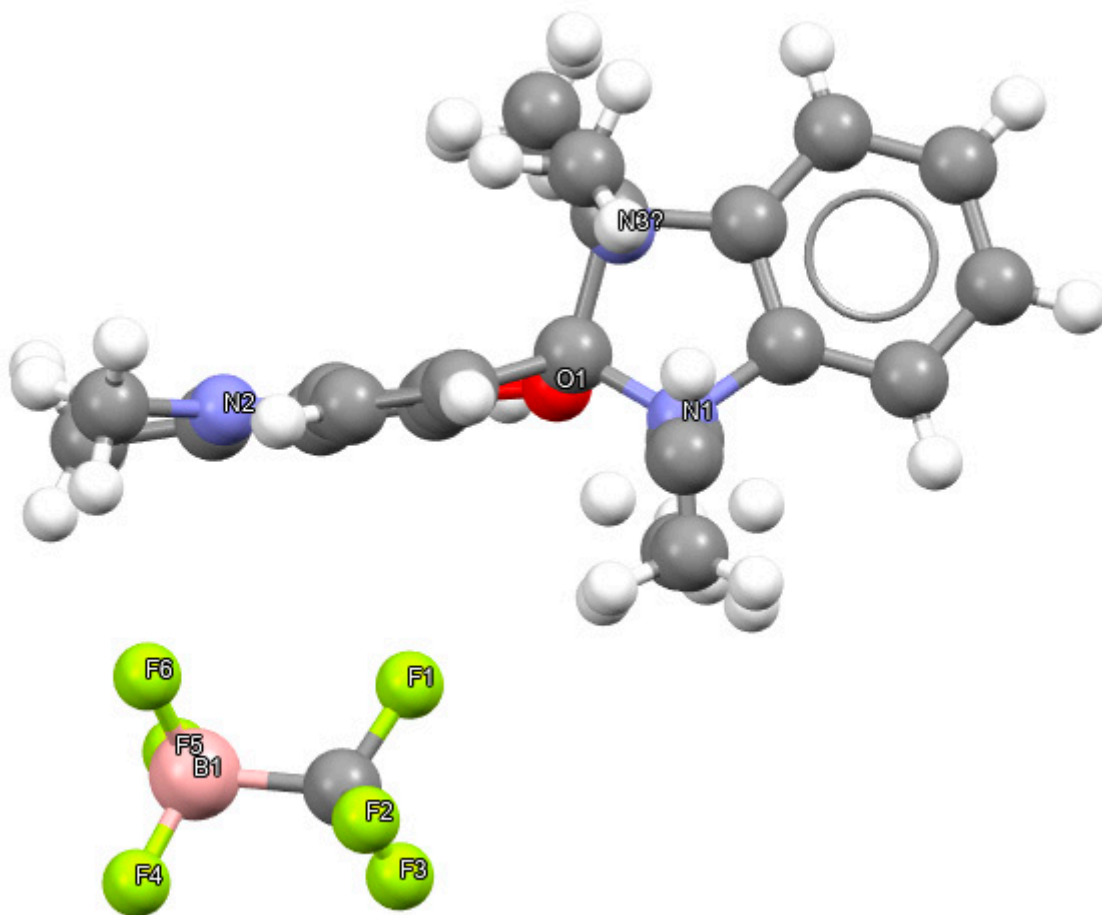

**Database Identifier:** MOVNIX

**Formula:** [PSP]X; X = I, NO<sub>3</sub>, SCN, BF<sub>4</sub>, ClO<sub>4</sub>, PF<sub>6</sub>, CF<sub>3</sub>BF<sub>3</sub>, OTf, and BPh<sub>4</sub>, PSP= 1-methyl-3,3,5',6'-tetramethylspiro[indoline-2,2'-[2*H*]pyran[3,2-*b*]pyridinium]

**Figure S1.** Structures (including refcodes) of a crystalline compound from CSD database with a geometry corresponding to the one discussed in the work.

**Table S1.** MEP maxima at the 0.001 au isodensity contour on isolated  $\text{TF}_3\text{-TrF}_2$  monomers (Tr= B, Al, Ga; T= C, Si, Ge). Data given in kcal/mol.

|    | B                                 | Al                                 | Ga                                |
|----|-----------------------------------|------------------------------------|-----------------------------------|
| C  | $\sigma$ 18.9/12.3*<br>$\pi$ 63.3 | $\sigma$ 30.0/7.9*<br>$\pi$ 111.8  | $\sigma$ 35.5/15.0*<br>$\pi$ 94.6 |
| Si | $\sigma$ 51.5/36.3*<br>$\pi$ 57.0 | $\sigma$ 42.9/32.8*<br>$\pi$ 98.1  | $\sigma$ 48.8/42.3*<br>$\pi$ 85.5 |
| Ge | $\sigma$ 55.4/33.4*<br>$\pi$ 63.1 | $\sigma$ 47.4/29.0*<br>$\pi$ 107.4 | $\sigma$ 53.1/38.3*<br>$\pi$ 93.5 |

\*Maximum lying on the extension of the Tr-T bond (at T atom)

**Table S2.** MEP maxima at the 0.001 au isodensity contour on isolated  $\text{TrCl}_3\text{-TrCl}_2$  monomers (Tr= B, Al, Ga; T= C, Si, Ge). Data given in kcal/mol.

|    | B                                    | Al                                    | Ga                                |
|----|--------------------------------------|---------------------------------------|-----------------------------------|
| C  | $\sigma$ 1.0/1.7*<br>$\pi$ 38.3/19.0 | $\sigma$ 11.0/4.1*<br>$\pi$ 84.2/60.8 | $\sigma$ 5.3*<br>$\pi$ 74.1/60.8  |
| Si | $\sigma$ 31.2/16.7*<br>$\pi$ 35.0    | $\sigma$ 25.7/17.0*<br>$\pi$ 76.7     | $\sigma$ 28.0/22.1*<br>$\pi$ 67.6 |
| Ge | $\sigma$ 36.1/16.0*<br>$\pi$ 38.5    | $\sigma$ 29.7/15.6*<br>$\pi$ 81.8     | $\sigma$ 31.7/20.7*<br>$\pi$ 72.1 |

\*Maximum lying on the extension of the Tr-T bond (at T atom)

**Table S3.** MEP maxima at the 0.001 au isodensity contour on isolated  $\text{TrBr}_3\text{-TrBr}_2$  monomers (Tr= B, Al, Ga; T= C, Si, Ge). Data given in kcal/mol.

|    | B                                     | Al                                   | Ga                                   |
|----|---------------------------------------|--------------------------------------|--------------------------------------|
| C  | $\sigma$ -1.7/1.3*<br>$\pi$ 29.8/10.4 | $\sigma$ 4.1/5.8*<br>$\pi$ 70.7/40.6 | $\sigma$ 6.6/5.2*<br>$\pi$ 64.5/42.9 |
| Si | $\sigma$ 25.0/11.5*<br>$\pi$ 26.7     | $\sigma$ 16.6/13.1*<br>$\pi$ 67.8    | $\sigma$ 17.8/17.0*<br>$\pi$ 59.7    |
| Ge | $\sigma$ 28.7/11.6*<br>$\pi$ 29.9     | $\sigma$ 19.9/12.0*<br>$\pi$ 71.6    | $\sigma$ 21.2/15.9*<br>$\pi$ 62.9    |

\*Maximum lying on the extension of the Tr-T bond (at T atom)



**Table S4.** Summary of trimers geometry optimization.

| <b>TX<sub>3</sub>-TrX<sub>2</sub> + 2 NCH</b> | Unusual trimer<br>(diagonally aligned) | Trimer $\pi$ - $\pi$ | Trimer $\sigma$ - $\pi$ |
|-----------------------------------------------|----------------------------------------|----------------------|-------------------------|
| <b>2</b>                                      | √                                      | √                    | -                       |
| <b>11</b>                                     | √                                      | √                    | -                       |
| <b>20</b>                                     | -                                      | √                    | -                       |
|                                               |                                        |                      |                         |
| <b>4</b>                                      | -                                      | √                    | √                       |
| <b>13</b>                                     | -                                      | √                    | √                       |
| <b>22</b>                                     | -                                      | √                    | √                       |

**Table S5.** The  $\sigma$ -hole maxima at the 0.001 au isodensity contour on TX<sub>3</sub>-TrX<sub>2</sub> dimers (Tr= B, Al; T= C, Si; X= F, Cl, Br) with hydrogen cyanide. Data given in kcal/mol.

|                          | <b>2</b> CF <sub>3</sub> -<br>AlF <sub>2</sub> | <b>11</b> CCl <sub>3</sub> -<br>AlCl <sub>2</sub> | <b>20</b> CBr <sub>3</sub> -<br>AlBr <sub>2</sub> | <b>4</b> SiF <sub>3</sub> -BF <sub>2</sub> | <b>13</b> SiCl <sub>3</sub> -<br>BCl <sub>2</sub> | <b>22</b> SiBr <sub>3</sub> -<br>BBr <sub>2</sub> |
|--------------------------|------------------------------------------------|---------------------------------------------------|---------------------------------------------------|--------------------------------------------|---------------------------------------------------|---------------------------------------------------|
| $\sigma$ -hole<br>maxima | -7.6                                           | -7.5                                              | -5.3                                              | 33.8                                       | 9.5                                               | 3.9                                               |

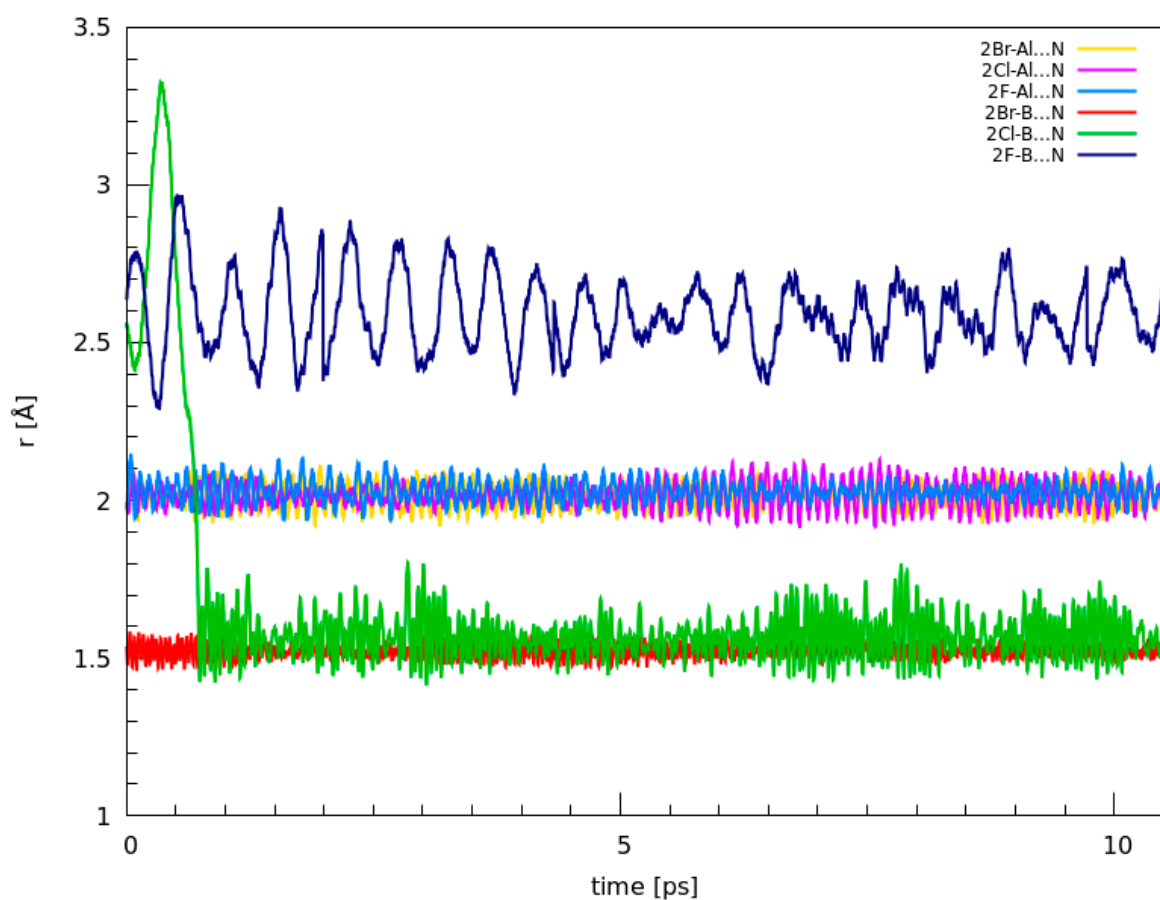

**Figure S2.** Time-evolution of metric parameters between the interacting pairs. Calculations performed at the PBE-D3BJ/TZVP-MOLOPT-GTH level of theory.

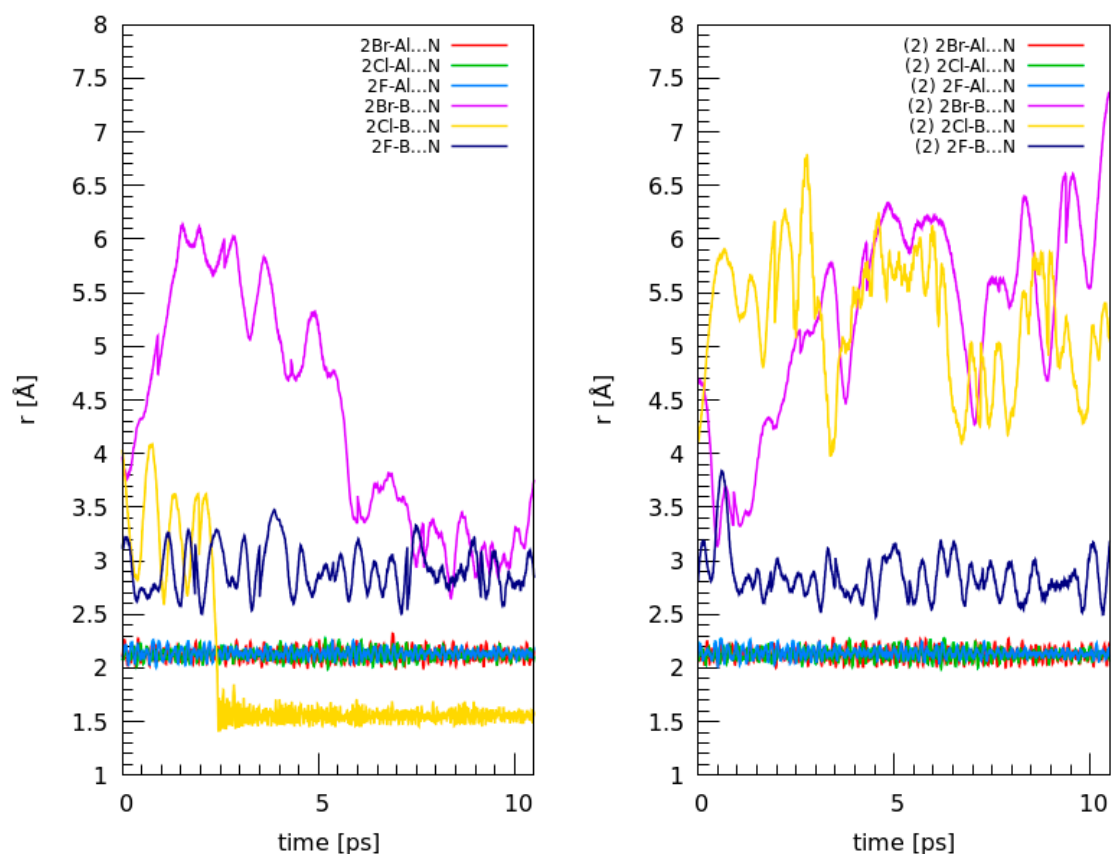

**Figure S3.** Time-evolution of metric parameters between the interacting pairs in the  $\pi$ -hole/ $\pi$ -hole trimers. Left: first interacting pair, Right: second interacting pair. Calculations performed at the PBE-D3BJ/TZVP-MOLOPT-GTH level of theory.

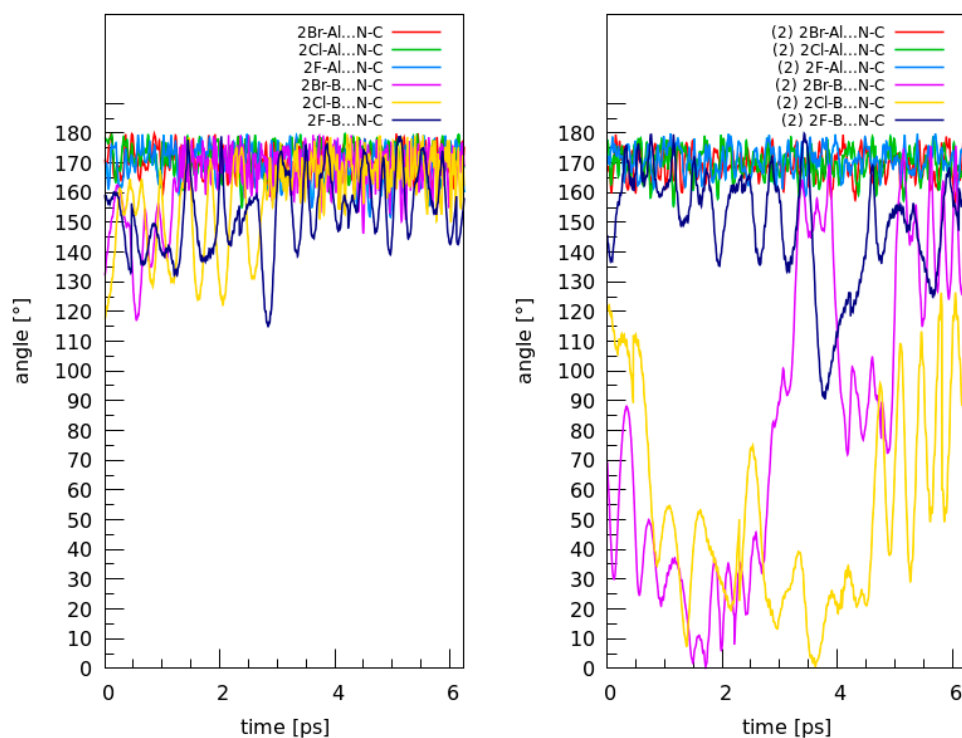

**Figure S4.** Time-evolution of Tr...N-C angles throughout the BOMD simulation for the  $\pi$ -hole/ $\pi$ -hole trimers. Calculations performed at the PBE0-D3BJ/TZVP-MOLOPT-GTH level of the theory.

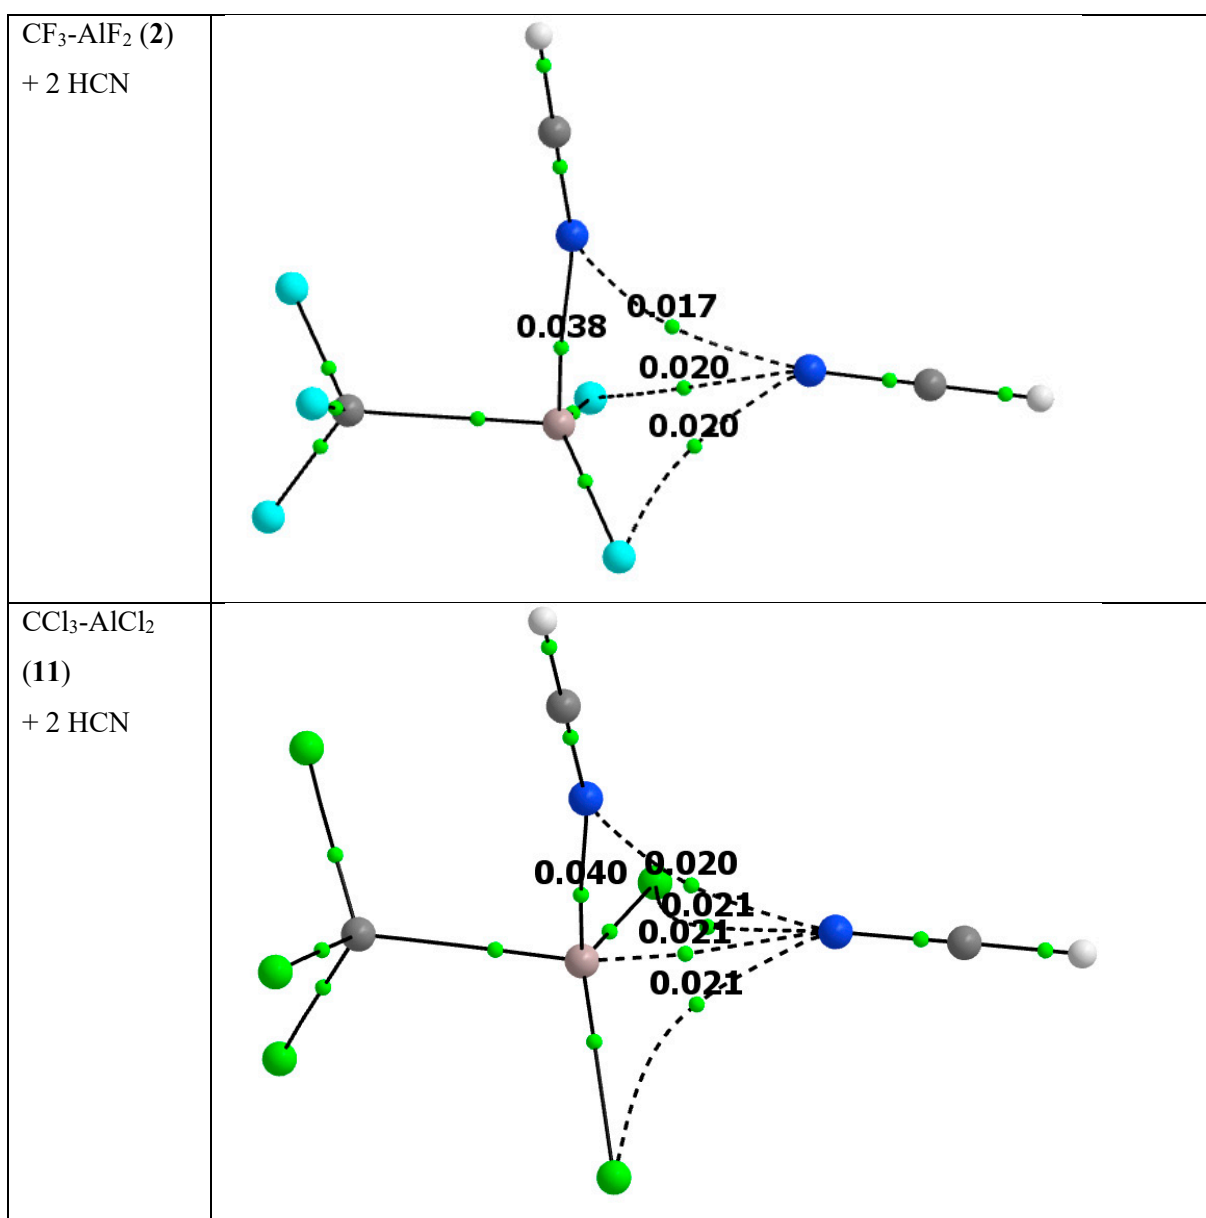

**Figure S5.** QTAIM diagrams for “unusual trimers” studied in this work. QTAIM bond paths are represented by dashed lines while numbers given are  $\rho$  at BCPs in au.

| $\text{TX}_3\text{-TrX}_2$<br>+ 2 HCN | Trimers $\sigma\text{-}\pi$                                                        | $E_{\text{int}}$ |
|---------------------------------------|------------------------------------------------------------------------------------|------------------|
| $\text{SiF}_3\text{-BF}_2$<br>(4)     | 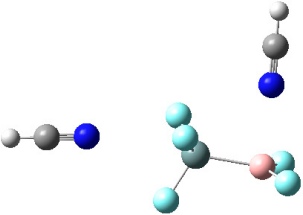  | -0.55            |
| $\text{SiCl}_3\text{-BCl}_2$<br>(13)  |   | -0.66            |
| $\text{SiBr}_3\text{-BBr}_2$<br>(22)  |  | -0.60            |

**Figure S6.** Optimized structures of trimers obtained by attaching second HCN molecule to the  $\sigma$ -hole site of  $\text{TX}_3\text{-TrX}_2\cdots\text{NCH}$  dimers.

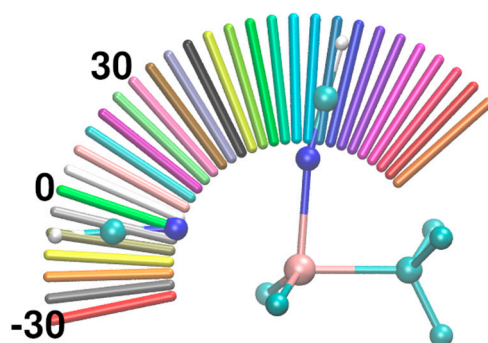

**Figure S7.** Overview of structures generated for the interaction energy study of the “residual  $\pi$ -hole”  $\text{CF}_3\text{-AlF}_2 + 2\text{HCN}$  trimer. The optimized atomic positions are shown, but the HCN molecule at 0 degrees label was removed and used as an interaction probe. It was located at the positions indicated by coloured sticks and numbered with angle values from -30 to 120 degrees. The vertically aligned HCN molecule was removed in the first set of structures, but present in the second set.

**Table S6.** Coordinates of dimers.

| Dimer with HCN                      | coords |             |             |             |
|-------------------------------------|--------|-------------|-------------|-------------|
| CF <sub>3</sub> -AlF <sub>2</sub>   | C      | 0.27737400  | -0.04461800 | -0.35622200 |
|                                     | Al     | 1.05524600  | -1.91431500 | -0.24479300 |
|                                     | F      | -0.88138500 | 0.10924400  | -1.07174100 |
|                                     | F      | 1.18514200  | 0.84335500  | -0.91221800 |
|                                     | F      | 0.01187800  | 0.46318300  | 0.90604400  |
|                                     | F      | 1.84883200  | -2.49374400 | -1.61186100 |
|                                     | F      | 0.29243600  | -2.99672900 | 0.79486500  |
|                                     | N      | 2.66796600  | -1.34556000 | 0.91604400  |
|                                     | C      | 3.55291000  | -0.94824400 | 1.57104300  |
|                                     | H      | 4.37004800  | -0.58532200 | 2.17504600  |
| SiF <sub>3</sub> -BF <sub>2</sub>   | Si     | 0.29104900  | -0.07528600 | -0.42275500 |
|                                     | B      | 1.01989600  | -1.95745400 | -0.41778500 |
|                                     | F      | -0.49028000 | 0.27417400  | -1.81086400 |
|                                     | F      | 1.45976900  | 1.05233000  | -0.25308100 |
|                                     | F      | -0.76989100 | 0.17256600  | 0.79070300  |
|                                     | F      | 1.47168600  | -2.52780000 | -1.55177200 |
|                                     | F      | 1.22525100  | -2.61696500 | 0.73906300  |
|                                     | N      | -1.33729500 | -2.64308300 | -0.69705000 |
|                                     | C      | -2.43454100 | -3.05452100 | -0.82697400 |
|                                     | H      | -3.43733300 | -3.43168300 | -0.94592400 |
| CCl <sub>3</sub> -AlCl <sub>2</sub> | C      | 0.09619300  | -0.12018100 | -0.43605500 |
|                                     | Al     | 0.67955700  | -2.04374300 | -0.43126400 |
|                                     | Cl     | -0.85314100 | 0.24774800  | -1.92885500 |
|                                     | Cl     | 1.53624100  | 0.95729100  | -0.38165800 |
|                                     | Cl     | -0.94770900 | 0.22639800  | 0.99754300  |
|                                     | Cl     | 1.50271400  | -2.78235200 | -2.25293100 |
|                                     | Cl     | 1.38354300  | -2.80921000 | 1.42888600  |
|                                     | N      | -1.22808700 | -2.80304500 | -0.49837900 |
|                                     | C      | -2.33609500 | -3.18105300 | -0.53678200 |
|                                     | H      | -3.35638300 | -3.53023600 | -0.57215700 |
| SiCl <sub>3</sub> -BCl <sub>2</sub> | Si     | 0.26548400  | -0.06425400 | -0.32402100 |



|                                     |    |             |             |             |
|-------------------------------------|----|-------------|-------------|-------------|
|                                     | B  | 0.94744200  | -1.96237400 | -0.21039900 |
|                                     | Cl | -1.12724500 | 0.18730400  | -1.84706700 |
|                                     | Cl | 1.88182800  | 1.18775500  | -0.72986400 |
|                                     | Cl | -0.59839800 | 0.57510500  | 1.45572100  |
|                                     | Cl | 1.15685800  | -2.89130600 | -1.69180900 |
|                                     | Cl | 1.63722100  | -2.53989200 | 1.30348000  |
|                                     | N  | -1.44612400 | -2.55387800 | 0.24245900  |
|                                     | C  | -2.53559600 | -2.95032300 | 0.46452100  |
|                                     | H  | -3.53149900 | -3.30983600 | 0.66709100  |
| CBr <sub>3</sub> -AlBr <sub>2</sub> | C  | 0.63503200  | 0.16112000  | -0.37273600 |
|                                     | Al | 1.33198000  | -1.71812300 | -0.39917200 |
|                                     | Br | -0.29631500 | 0.58043400  | -2.04719300 |
|                                     | Br | 2.16999500  | 1.35881200  | -0.16272300 |
|                                     | Br | -0.60621000 | 0.42156300  | 1.12333300  |
|                                     | Br | 2.40854200  | -2.36632100 | -2.30651300 |
|                                     | Br | 2.02371200  | -2.56404100 | 1.60655400  |
|                                     | N  | -0.51131300 | -2.60032900 | -0.62454200 |
|                                     | C  | -1.58315400 | -3.05656900 | -0.75128000 |
| SiBr <sub>3</sub> -BBr <sub>2</sub> | H  | -2.57020300 | -3.47634000 | -0.86819800 |
|                                     | Si | 0.58386700  | 0.02596900  | -0.48589900 |
|                                     | B  | 1.00077400  | -1.95365300 | -0.29539600 |
|                                     | Br | -0.85026100 | 0.35399900  | -2.19560200 |
|                                     | Br | 2.42793200  | 1.22697500  | -0.83199200 |
|                                     | Br | -0.45914400 | 0.77987700  | 1.36634900  |
|                                     | Br | 1.71885600  | -2.70525800 | -1.99230700 |
|                                     | Br | 2.08339700  | -2.30823500 | 1.33630600  |
|                                     | N  | -0.40480900 | -2.61811800 | -0.06223900 |
|                                     | C  | -1.49467300 | -3.01183100 | 0.10397900  |
|                                     | H  | -2.49476800 | -3.38527300 | 0.25787800  |

**Table S7.** “Unusual” trimers coordinates

| AIM                                            | Coords |             |                         |
|------------------------------------------------|--------|-------------|-------------------------|
| CF <sub>3</sub> -AlF <sub>2</sub><br>+ 2 HCN   | C      | 0.81486300  | -0.77003100 -1.46206300 |
|                                                | Al     | 0.06431500  | -1.68196000 0.20707400  |
|                                                | F      | 0.78442100  | -1.60257700 -2.57949200 |
|                                                | F      | 2.10832200  | -0.31450000 -1.38762900 |
|                                                | F      | 0.05925300  | 0.33649200 -1.84615200  |
|                                                | F      | 0.85947000  | -3.16683200 0.38434400  |
|                                                | F      | -0.14038900 | -0.49278400 1.39555700  |
|                                                | N      | -1.69677000 | -1.92777300 -0.88514800 |
|                                                | C      | -2.56325300 | -1.95395200 -1.67319300 |
|                                                | H      | -3.36298200 | -1.97998100 -2.39559800 |
|                                                | N      | -1.45764600 | -2.83571900 1.75307900  |
|                                                | C      | -1.82672600 | -3.34946600 2.74644900  |
|                                                | H      | -2.15732700 | -3.81809400 3.65866500  |
| CCl <sub>3</sub> -AlCl <sub>2</sub><br>+ 2 HCN | C      | 0.75175300  | -0.78024600 -1.49374900 |
|                                                | Al     | 0.04037400  | -1.68783900 0.19971900  |
|                                                | Cl     | 0.73587200  | -1.90295300 -2.92107300 |
|                                                | Cl     | 2.44941800  | -0.24691800 -1.22140600 |
|                                                | Cl     | -0.23190400 | 0.67846500 -1.94388700  |
|                                                | Cl     | 1.18802000  | -3.50258400 0.35953500  |
|                                                | Cl     | -0.08611200 | -0.09930700 1.64765600  |
|                                                | N      | -1.73170000 | -1.96304900 -0.82892300 |
|                                                | C      | -2.63024500 | -2.01619200 -1.57966800 |
|                                                | H      | -3.45445900 | -2.06302300 -2.27303200 |
|                                                | N      | -1.40814100 | -2.81065200 1.73406800  |
|                                                | C      | -1.86593900 | -3.34024800 2.68119500  |
|                                                | H      | -2.27138400 | -3.82262900 3.55545900  |
| CBr <sub>3</sub> -AlBr <sub>2</sub><br>+ 2 HCN | C      | 0.68268500  | -0.81461200 -1.47083500 |
|                                                | Al     | -0.02264000 | -1.71955800 0.22216200  |
|                                                | Br     | 0.68052400  | -2.01612900 -3.00946300 |
|                                                | Br     | 2.50744300  | -0.25579300 -1.13888200 |
|                                                | Br     | -0.36125300 | 0.76125400 -1.95861100  |

|  |    |             |             |             |
|--|----|-------------|-------------|-------------|
|  | Br | 1.26409700  | -3.60724900 | 0.34716500  |
|  | Br | -0.09250300 | 0.01181900  | 1.71620400  |
|  | N  | -1.76265200 | -1.98646200 | -0.79820300 |
|  | C  | -2.61458000 | -2.00975700 | -1.58277000 |
|  | H  | -3.39352500 | -2.02630200 | -2.31260700 |
|  | N  | -1.35319500 | -2.78839100 | 1.72952100  |
|  | C  | -1.81902300 | -3.31345700 | 2.65618400  |
|  | H  | -2.22982500 | -3.79253800 | 3.51602900  |
